# Supplementary material for: Water-assisted growth of graphene on carbon nanotubes by the chemical vapor deposition method
Source: Royal Society of Chemistry journal article supplement (doi:10.1039/c3nr33855j), 2013-01-01
Supplement: c3nr33855j.pdf [file c3nr33855j.pdf]

## Support Information

Water-assisted growth few-layer graphene on carbon nanotube by the chemical vapor deposition method

Jian-Min Feng <sup>a,b</sup> and Ye-Jing Dai \* <sup>a</sup>

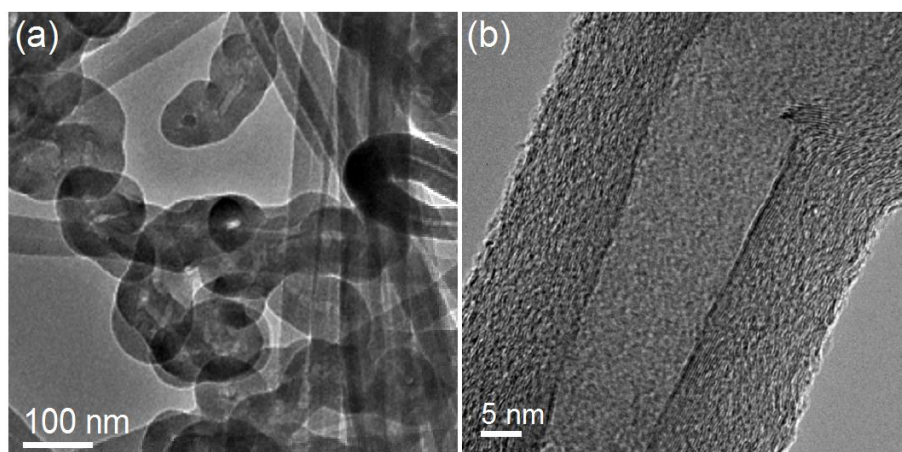

**Fig. S1** Transmission electron microscopy images of carbon nanotubes prepared from ferrocene and thiophene dissolved in ethanol and water via a continuous double-injection chemical vapor deposition process
